# Supplementary material for: Hashimoto Thyroiditis, Anti-Parietal Cell Antibodies: Associations With Autoimmune Diseases and Malignancies
Source: PubMed Central journal article supplement (PMC9072778; doi:10.3389/fendo.2022.860880), 2022-04-22
Supplement: Presentation_1.pdf [file Presentation_1.pdf]

*Supplementary Table 1 Type and frequency of the autoimmune diseases observed among patients with Hashimoto's thyroiditis*

| <b>Autoimmune disease</b>                                                            | <b>Number of patients (%)</b> |
|--------------------------------------------------------------------------------------|-------------------------------|
| <b>Vitiligo</b>                                                                      | 25 (3.0)                      |
| <b>Rheumatoid arthritis</b>                                                          | 18 (2.1)                      |
| <b>Systemic lupus erythematosus</b>                                                  | 12 (1.4)                      |
| <b>Multiple sclerosis</b>                                                            | 12 (1.4)                      |
| <b>Diabetes mellitus type 1</b>                                                      | 10 (1.2)                      |
| <b>Sjögren's disease</b>                                                             | 9 (1.1)                       |
| <b>Psoriatic arthritis</b>                                                           | 9 (1.1)                       |
| <b>Premature ovarian failure</b>                                                     | 9 (1.1)                       |
| <b>Systemic scleroderma</b>                                                          | 6 (0.7)                       |
| <b>Inflammatory bowel diseases (Colitis ulcerosa/Crohn's disease)</b>                | 6 (0.7)                       |
| <b>Psoriasis</b>                                                                     | 6 (0.7)                       |
| <b>Addison's disease</b>                                                             | 6 (0.7)                       |
| <b>Celiac disease</b>                                                                | 5 (0.6)                       |
| <b>Idiopathic thrombocytopenic purpura</b>                                           | 4 (0.5)                       |
| <b>Autoimmune liver diseases (primary biliary cholangitis, autoimmune hepatitis)</b> | 3 (0.4)                       |
| <b>Alopecia areata</b>                                                               | 3 (0.4)                       |
| <b>Glomerulonephritis</b>                                                            | 2 (0.3)                       |
| <b>Polymyalgia rheumatica</b>                                                        | 2 (0.3)                       |
| <b>Mixed connective tissue disease</b>                                               | 1 (0.1)                       |
| <b>Lichen planus</b>                                                                 | 1 (0.1)                       |
| <b>Dermatomyositis</b>                                                               | 1 (0.1)                       |
| <b>Myasthenia gravis</b>                                                             | 1 (0.1)                       |
| <b>Vasculitis</b>                                                                    | 1 (0.1)                       |
| <b>Ankylosing spondylitis</b>                                                        | 1 (0.1)                       |
| <b>Seronegative arthritis</b>                                                        | 1 (0.1)                       |
| <b>Autoimmune hemolytic anemia</b>                                                   | 1 (0.1)                       |
| <b>Pemphigus vulgaris</b>                                                            | 1 (0.1)                       |
| <b>Schoenlein Henoch purpura</b>                                                     | 1 (0.1)                       |
| <b>Myelitis transversa</b>                                                           | 1 (0.1)                       |
| <b>Latent autoimmune diabetes in adults</b>                                          | 1 (0.1)                       |
| <b>Autoimmune polychondritis</b>                                                     | 1 (0.1)                       |
| <b>CREST syndrome</b>                                                                | 1 (0.1)                       |

Supplementary Table 2 Univariate and multivariate analysis of factors associated with papillary thyroid carcinoma among women

| Characteristics                                                                                                                                                                                                                                                 | With PTC   | Without PTC | Univariate analysis (p value) | Multivariate analysis (OR, 95% CI) |
|-----------------------------------------------------------------------------------------------------------------------------------------------------------------------------------------------------------------------------------------------------------------|------------|-------------|-------------------------------|------------------------------------|
| Age (years)                                                                                                                                                                                                                                                     | 48.9±17.4  | 50.2±14.0   | 0.624                         | 1.001 (0.971-1.032)                |
| APCA                                                                                                                                                                                                                                                            | 8 (30.8%)  | 135 (20.2%) | 0.215                         | 1.680 (0.616-4.586)                |
| TPO antibodies                                                                                                                                                                                                                                                  | 16 (69.6%) | 569 (85.6%) | <b>0.043</b>                  | <b>0.315 (0.113-0.881)</b>         |
| Tg antibodies                                                                                                                                                                                                                                                   | 20 (76.9%) | 462 (70.6%) | 0.523                         | 0.867 (0.308-2.439)                |
| Family history for thyroid autoimmunity                                                                                                                                                                                                                         | 19 (73.1%) | 365 (55.0%) | 0.073                         | <b>3.228 (1.173-8.887)</b>         |
| Coexistence of other autoimmune diseases                                                                                                                                                                                                                        | 2 (7.7%)   | 122 (18.3%) | 0.201                         | 0.404 (0.093-1.761)                |
| Nagelkerke R Square 0.071, Cox & Schnell R Square 0.018 for logistic regression analysis<br>APCA, anti-parietal cell antibodies; TPO, thyroid peroxidase; Tg, thyroglobulin, PTC, papillary thyroid carcinoma; OR, odds ratio; 95% CI, 95% confidence intervals |            |             |                               |                                    |

Supplementary Table 3 Univariate and multivariate analysis of factors associated with malignancies

| Characteristics                                                                                                                                                                                                               | With malignancy | Without malignancy | Univariate analysis (p value) | Multivariate analysis (OR, 95% CI) |
|-------------------------------------------------------------------------------------------------------------------------------------------------------------------------------------------------------------------------------|-----------------|--------------------|-------------------------------|------------------------------------|
| Age (years)                                                                                                                                                                                                                   | 54.2±15.4       | 49.6±14.4          | <b>0.006</b>                  | <b>1.024 (1.007-1.042)</b>         |
| Gender (females)                                                                                                                                                                                                              | 74 (87.1%)      | 619 (82.0%)        | 0.293                         | 1.363 (0.696-2.669)                |
| APCA                                                                                                                                                                                                                          | 22 (25.9%)      | 158 (20.9%)        | 0.328                         | 1.124 (0.641-1.973)                |
| TPO antibodies                                                                                                                                                                                                                | 67 (82.7%)      | 650 (86.2%)        | 0.401                         | 0.682 (0.354-1.316)                |
| Tg antibodies                                                                                                                                                                                                                 | 59 (71.1%)      | 519 (70.0%)        | 0.900                         | 0.934 (0.547-1.595)                |
| Family history for thyroid autoimmunity                                                                                                                                                                                       | 48 (56.5%)      | 413 (55.1%)        | 0.819                         | 1.212 (0.752-1.954)                |
| Coexistence of other autoimmune diseases                                                                                                                                                                                      | 10 (11.8%)      | 130 (17.2%)        | 0.223                         | 0.654 (0.326-1.313)                |
| Nagelkerke R Square 0.030, Cox & Schnell R Square 0.014 for logistic regression analysis<br>APCA, anti-parietal cell antibodies; TPO, thyroid peroxidase; Tg, thyroglobulin; OR, odds ratio; 95% CI, 95% confidence intervals |                 |                    |                               |                                    |
